# Supplementary material for: In Vitro Antioxidant and Anti-Propionibacterium acnes Activities of Cold Water, Hot Water, and Methanol Extracts, and Their Respective Ethyl Acetate Fractions, from Sanguisorba officinalis L. Roots
Source: PubMed Central journal article supplement (PMC6278274; doi:10.3390/molecules23113001), 2018-11-16
Supplement: molecules-23-03001-s001.pdf [file molecules-23-03001-s001.pdf]

## Supplementary

**Table S1** Effect of various extracts from roots of *S. officinalis* L. on the bacterial growth determined by paper disc diffusion assay.

| Extract/<br>Fraction <sup>a</sup> | <i>E. coli</i>                   | <i>V. parahaemolyticus</i> | <i>L. monocytogenes</i> | <i>S. aureus</i> | <i>P. acnes</i> |
|-----------------------------------|----------------------------------|----------------------------|-------------------------|------------------|-----------------|
|                                   | Inhibition zone / 5 mg treatment |                            |                         |                  |                 |
| CWE                               | - <sup>b</sup>                   | -                          | -                       | -                | +               |
| HWE                               | -                                | -                          | -                       | -                | +               |
| ME                                | +                                | +                          | +                       | +                | +               |

<sup>a</sup> CWE: cold water extract; HWE: hot water extract; ME: methanol extract. <sup>b</sup> No inhibition (-) and Inhibition (+). <sup>c</sup> *Escherichia coli*, *Vibrio parahaemolyticus*, *Listeria monocytogenes*, *Staphylococcus aureus*, *Propionibacterium acnes*.

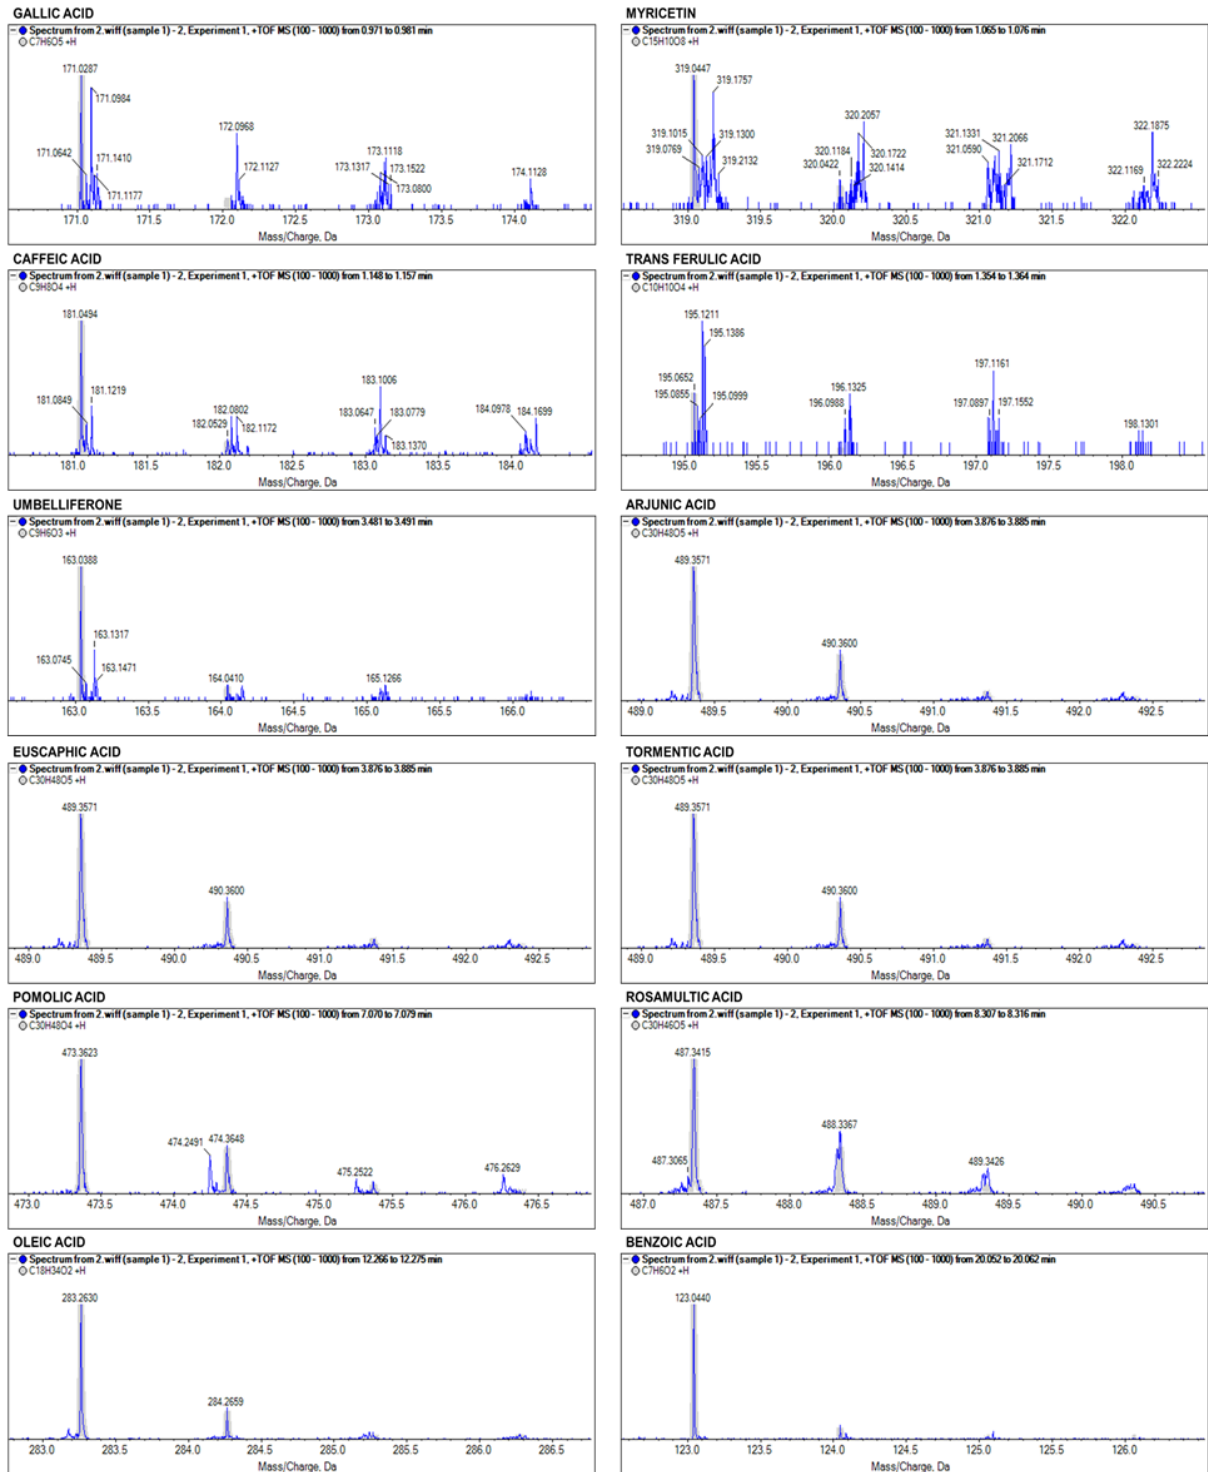

Figure S1 UHPLC-QTOF-MS spectra of major compounds in SOR CWE-EA.

**CATECHIN**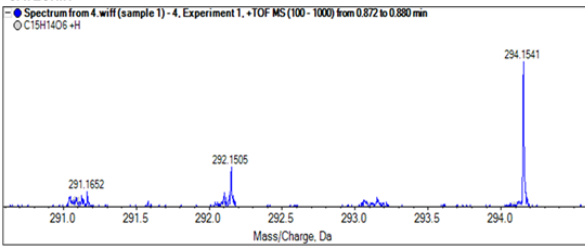**GALLIC ACID**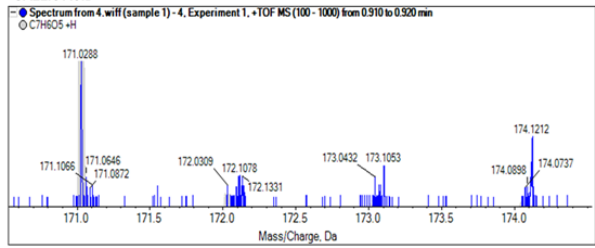**HYPEROSIDE**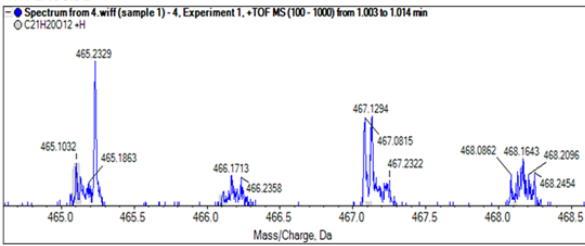**CATECHIN GALLATE**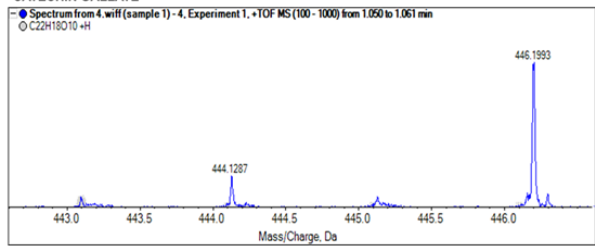**EPICATECHIN GALLATE**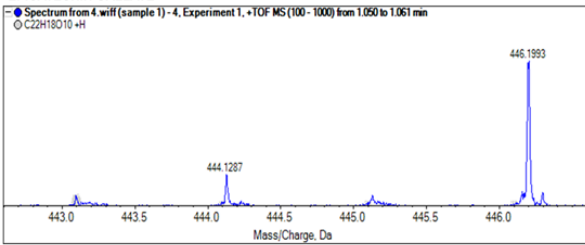**ELLAGIC ACID**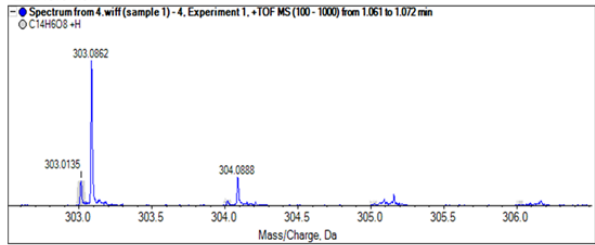**CAFFEIC ACID**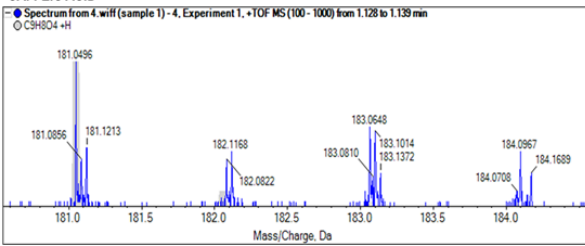**SYRINGIC ACID**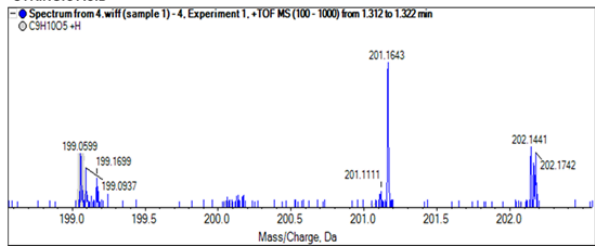

**TRANS FERULIC ACID**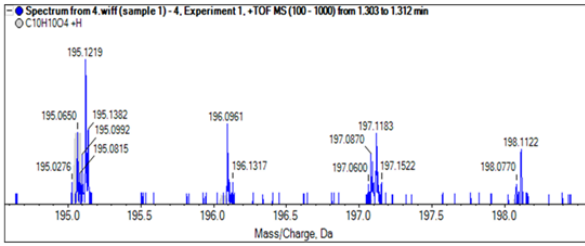**UMBELLIFERONE**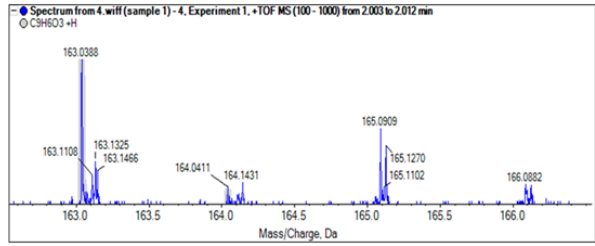**QUERCETIN**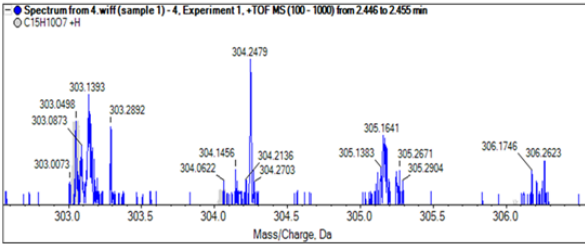**ARJUNIC ACID**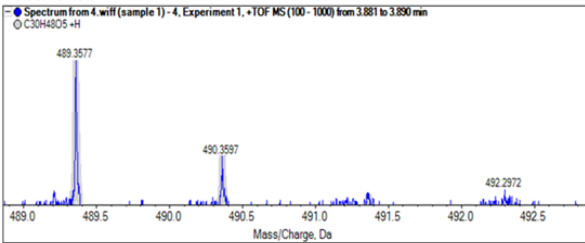**EUSCAPHIC ACID**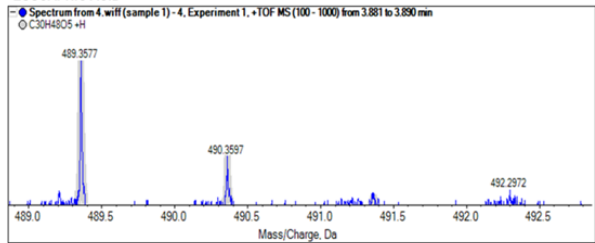**TORMENTIC ACID**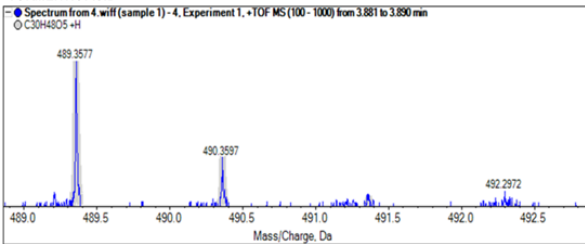**KAEMPFEROL**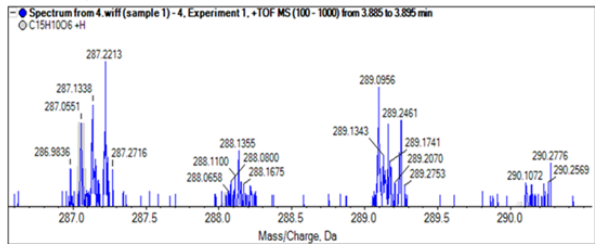**LIMONIN**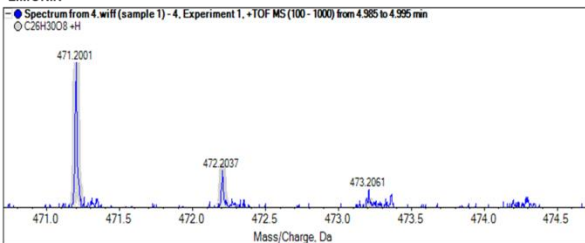**POMOLIC ACID**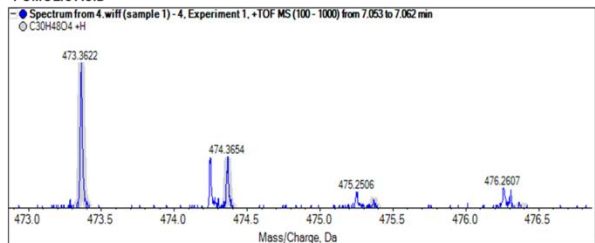**ROSAMULTIC ACID**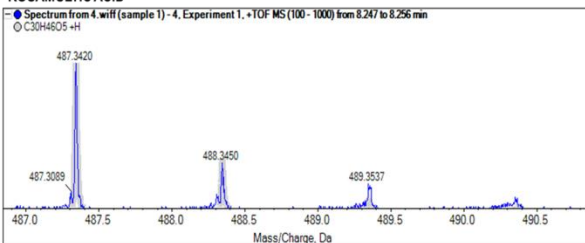**BENZOIC ACID**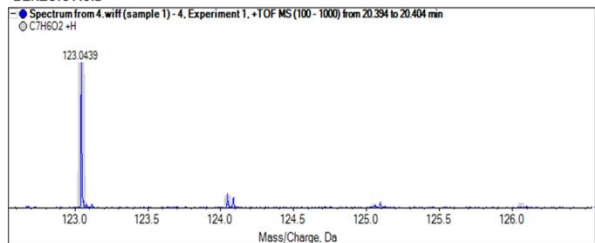

Figure S2 UHPLC-QTOF-MS spectra of major compounds in SOR HWE-EA.
